# Supplementary material for: Differentiated Neurons Are More Vulnerable to Organophosphate and Carbamate Neurotoxicity than Undifferentiated Neurons Due to the Induction of Redox Stress and Accumulate Oxidatively-Damaged Proteins
Source: MDPI journal article supplement (doi:10.3390/brainsci13050728), 2023-04-26
Supplement: s1 [file s1]

**Supplementary Table S1.** Comparison of the cytotoxicity induced by CPO, AZO and Aldicarb to undifferentiated versus differentiated SH-SY5Y cells.

| Pesticide | Treatments | MTT assay | LDH assay | Treatments                                                                   | ATP assay | ROS assay |          | PCC assay                               |
|-----------|------------|-----------|-----------|------------------------------------------------------------------------------|-----------|-----------|----------|-----------------------------------------|
| CPO       | 1          | NS        | 0.0216    | IC <sub>10</sub><br>IC <sub>20</sub><br>IC <sub>50</sub><br>IC <sub>80</sub> |           | 6 hours   | 24 hours | <0.0001<br>0.0004<br><0.0001<br><0.0001 |
|           | 10         | NS        | 0.0002    |                                                                              | NS        | 0.0022    | 0.0002   |                                         |
|           | 20         | 0.0005    | NS        |                                                                              | 0.0031    | NS        | NS       |                                         |
|           | 50         | <0.0001   | <0.0001   |                                                                              | <0.0001   | <0.0001   | 0.0002   |                                         |
|           | 100        | NS        | 0.0008    |                                                                              | NS        | <0.0001   | 0.0012   |                                         |
|           | 200        | NS        | NS        |                                                                              |           |           |          |                                         |
| AZO       | 1          | 0.0253    | 0.0056    | IC <sub>10</sub><br>IC <sub>20</sub><br>IC <sub>50</sub><br>IC <sub>80</sub> | NS        | <0.0001   | <0.0001  | <0.0001                                 |
|           | 10         | <0.0001   | NS        |                                                                              | 0.0444    | <0.0001   | <0.0001  | <0.0001                                 |
|           | 20         | 0.0006    | 0.0145    |                                                                              | NS        | <0.0001   | <0.0001  | <0.0001                                 |
|           | 50         | NS        | NS        |                                                                              | 0.0270    | <0.0001   | <0.0001  | <0.0001                                 |
|           | 100        | NS        | NS        |                                                                              |           |           |          |                                         |
|           | 200        | NS        | NS        |                                                                              |           |           |          |                                         |
| Aldicarb  | 1          | NS        | NS        | IC <sub>10</sub><br>IC <sub>20</sub><br>IC <sub>50</sub><br>IC <sub>80</sub> |           |           |          |                                         |
|           | 10         | NS        | <0.0001   |                                                                              | NS        | NS        | NS       | <0.0001                                 |
|           | 20         | 0.0361    | NS        |                                                                              | NS        | 0.0006    | 0.0066   | <0.0001                                 |
|           | 50         | 0.0015    | NS        |                                                                              | 0.0005    | <0.0001   | <0.0001  | <0.0001                                 |
|           | 100        | NS        | NS        |                                                                              | NS        | <0.0001   | <0.0001  | 0.1945                                  |
|           | 200        | NS        | NS        |                                                                              |           |           |          |                                         |

Undifferentiated or differentiated SH-SY5Y cells were treated with chlorpyrifos-oxon (CPO), Azamethiphos-oxon (AZO) or aldicarb. Cell viability measurements were made using MTT, LDH or ATP levels and the production of ROS and PCC was quantified. Comparisons between assays means were made by a two-way ANOVA with Tukey's multiple comparison tests and the values shown for significant changes are marked or listed as NS for non-significant.

Abbreviations: ATP, Adenosine triphosphate; IC, inhibitor concentration (producing 10-80% inhibition); LDH, Lactate dehydrogenase; MTT, (4,5-dimethylthiazol-2-yl)-2,5-diphenyltetrazolium bromide; PCC, protein carbonyl content; ROS, reactive oxygen species.
